# Supplementary material
Source: PubMed Central journal article supplement (PMC4567688)
Supplement: NIHMS710851-supplement-01.pdf [file NIHMS710851-supplement-01.pdf]

|                                | <b>ICD-9 or CTC</b>                                                                                                                                                                                                                                                                                                                                                                                                                                                                                                                                                                                                          |
|--------------------------------|------------------------------------------------------------------------------------------------------------------------------------------------------------------------------------------------------------------------------------------------------------------------------------------------------------------------------------------------------------------------------------------------------------------------------------------------------------------------------------------------------------------------------------------------------------------------------------------------------------------------------|
| Cardiac catheterization        | 37.21-37.29                                                                                                                                                                                                                                                                                                                                                                                                                                                                                                                                                                                                                  |
| Electrophysiology study        | 37.2, 37.26, and 37.27                                                                                                                                                                                                                                                                                                                                                                                                                                                                                                                                                                                                       |
| Genetic syndrome               | 758.1, 758.2, 758.0, 758.31, 758.32, 758.33, 758.9, 758.6, 758.83, and 758.89)                                                                                                                                                                                                                                                                                                                                                                                                                                                                                                                                               |
| Non-cardiac congenital anomaly | 740.0-740.2, 741.0, 741.9, 742.0-742.5, 742.9, 748.0-748.4, 749.0-749.2, 750.3, 751.1, 751.2, 751.4, 751.6, 753.0, 753.15, 753.2, 753.5, 756.6, and 756.7                                                                                                                                                                                                                                                                                                                                                                                                                                                                    |
| Prematurity                    | 765.2-765.28                                                                                                                                                                                                                                                                                                                                                                                                                                                                                                                                                                                                                 |
| Congenital heart disease       | 745, 746, 747                                                                                                                                                                                                                                                                                                                                                                                                                                                                                                                                                                                                                |
| Pulmonary hypertension         | 416.0, 416.2, 416.8, 416.9                                                                                                                                                                                                                                                                                                                                                                                                                                                                                                                                                                                                   |
| Myocarditis                    | 422.0, 422.9, 422.91, 422.99, 429.0                                                                                                                                                                                                                                                                                                                                                                                                                                                                                                                                                                                          |
| Cardiomyopathy                 | 425.1, 425.4, 425.7-9                                                                                                                                                                                                                                                                                                                                                                                                                                                                                                                                                                                                        |
| Orthotopic heart transplant    | v42.1                                                                                                                                                                                                                                                                                                                                                                                                                                                                                                                                                                                                                        |
| Cardiac operations             | 35.00- 35.99 and 37.5, 37.51, 37.52, and 39.0 and 39.21                                                                                                                                                                                                                                                                                                                                                                                                                                                                                                                                                                      |
| Trans-catheter interventions   | 00.40-00.48, 0.66, 35.05, 35.07, 35.09, 35.52, 35.55, 35.96, 35.97, 36.06, 36.07, 37.34, 37.90                                                                                                                                                                                                                                                                                                                                                                                                                                                                                                                               |
| Mechanical ventilation         | 93.90, 96.70-96.72                                                                                                                                                                                                                                                                                                                                                                                                                                                                                                                                                                                                           |
| Mechanical circulatory support | 39.65,39.61, 39.66, 37.62, 37.61, 37.60                                                                                                                                                                                                                                                                                                                                                                                                                                                                                                                                                                                      |
| Hemodialysis                   | 39.95                                                                                                                                                                                                                                                                                                                                                                                                                                                                                                                                                                                                                        |
| Inotropes                      | 131321.20.20.70.1, 131321.20.20.01.2, 131321.20.20.70.1, 131321.20.20.04.2, 131321.20.20.29.2, 131351 (all suffixes), 131311.20.20.33.2, 131311.20.20.65.2, 131311.20.20.82.2, 131311.20.20.94.2, 131311.20.20.45.2, 131311.20.20.82.2, 131311.20.20.94.2, 131305.20.20.22.2, 131305.20.20.68.2, 131305.20.20.86.2, 131305.20.20.02.3, 131305.20.20.06.3,, 151471.20.20.26.6, 151471.20.20.20.6, 151471.20.20.33.6, 151471.20.20.65.6,, 131355.20.20.86.1, 131355.20.20.20.2, 131321.20.20.36.2, 131321.20.20.51.2                                                                                                           |
| Systemic vasodilators          | 136110.10.11.20.2, 136105.20.20.82.1, 136105.20.20.11.2, 134101.20.20.36.2, 133181.20.20.03.2, 13111.20.20.01.2, 13111.20.20.11.2, 13111.20.20.20.2, 13111.20.20.26.2, 13111.20.20.36.2, 133245                                                                                                                                                                                                                                                                                                                                                                                                                              |
| Pulmonary vasodilators         | 191321.10.11.26.2, 191321.10.11.27.2, 191321.10.11.36.2, 191321.10.11.51.2, 191321.20.20.20.2, 191322.10.11.06.2, 191322.10.11.11.2, 191322.10.11.20.2, 191322.10.11.26.2, 191323.10.11.06.02, 191323.10.11.11.2, 191323.10.11.20.2, 191323.10.11.26.2, 133155.20.20.86.1, 133155.20.20.03.2, 161217.20.20.01.2, 161217.20.20.26.2, 161217.20.20.06.2, 161217.20.20.36.2, 161217.20.20.11.2, 161217.20.20.51.2, 161217.20.20.20.2, 161217.20.20.20.2, 161217.42.42.12.1, 161217.42.42.10.2, 133153.42.42.20.1, 133153.42.42.26.1, 133151.10.11.39.2, 133151.10.11.55.2, 133148.10.11.2, 133148.10.11.20.2, 115140.42.42.00.0 |
| Calcium Channel Blockers       | 133201,133231, 133211                                                                                                                                                                                                                                                                                                                                                                                                                                                                                                                                                                                                        |

**Supplementary Table 1: International Classification of Disease ninth revision code (ICD-9) and Clinical Transaction Code (CTC)**

|                                                                                   | No intervention performed | Intervention performed | <i>p</i> |
|-----------------------------------------------------------------------------------|---------------------------|------------------------|----------|
| Catheterization Procedures (n)                                                    | 4898                      | 1441                   |          |
| Individual Patients (n)                                                           | 3602                      | 982                    |          |
| Age (years)                                                                       | 2.7 (IQR: 0.6-10.7)       | 1.3 (IQR: 0.5-4.4)     | <0.001   |
| Age categories:                                                                   |                           |                        |          |
| <i>Neonate with prematurity</i>                                                   | 0.3% (14)                 | 0.5% (7)               | <0.001   |
| <i>Neonate without prematurity</i>                                                | 2.6% (126)                | 5.6% (81)              |          |
| <i>Infant (30 days to 1 year) with prematurity</i>                                | 3.4% (168)                | 4.7% (68)              |          |
| <i>Infant (30 days to 1 year) without prematurity</i>                             | 27.5% (1,345)             | 33.5% (482)            |          |
| 1-8 years                                                                         | 35.3% (1,727)             | 38.3% (552)            |          |
| 8-18 years                                                                        | 26.4% (1,295)             | 14.4% (208)            |          |
| >18 years                                                                         | 4.6% (223)                | 3.0% (43)              |          |
| Male sex % (n)                                                                    | 50.2% (2,460)             | 53.9% (776)            | 0.02     |
| Race % (n)                                                                        |                           |                        |          |
| White                                                                             | 62.4% (3,054)             | 60.1% (866)            | 0.01     |
| Black                                                                             | 14.9% (731)               | 12.9% (186)            |          |
| Asian                                                                             | 3.2% (156)                | 4.2% (60)              |          |
| Other                                                                             | 15.1% (740)               | 17.9% (258)            |          |
| Missing                                                                           | 4.4% (217)                | 4.9% (71)              |          |
| Payor % (n)                                                                       |                           |                        |          |
| Private                                                                           | 37.9% (1,854)             | 40.0% (576)            | 0.29     |
| Medicaid                                                                          | 43.3% (2,122)             | 41.2% (594)            |          |
| Other                                                                             | 18.8% (922)               | 18.8% (271)            |          |
| Diagnosis % (n)                                                                   |                           |                        |          |
| IPAH                                                                              | 24.6% (1,205)             | 6.9% (99)              | <0.001   |
| APAH-CHD                                                                          | 62.8% (3,074)             | 89.0% (1,283)          |          |
| Cardiomyopathy with PH                                                            | 7.0% (341)                | 1.3% (18)              |          |
| Chronic thromboembolic pulmonary hypertension                                     | 0.8% (37)                 | 0.8% (12)              |          |
| PH with orthotopic heart transplant                                               | 4.9% (241)                | 2.0% (29)              |          |
| Genetic syndrome % (n)                                                            | 18.6% (913)               | 14.8% (213)            | 0.001    |
| Non-cardiac congenital anomaly                                                    | 11.8% (580)               | 11.9% (172)            | 0.922    |
| Mechanical ventilation prior to catheterization                                   | 16.0% (781)               | 17.8% (257)            | 0.09     |
| Medications prior to catheterization                                              |                           |                        |          |
| Pulmonary vasodilator                                                             | 19.0% (930)               | 14.9% (215)            | <0.001   |
| PDE-5 inhibitors                                                                  | 10.1% (494)               | 9.0% (130)             | 0.23     |
| Calcium channel blockers                                                          | 5.8% (286)                | 3.4% (49)              | <0.001   |
| Prostacyclin analogues                                                            | 1.3% (64)                 | 0.4% (6)               | 0.004    |
| ETA antagonists                                                                   | 6.1% (298)                | 3.5% (51)              | <0.001   |
| Inhaled nitric oxide                                                              | 0.1% (4)                  | 0.1% (1)               | 0.88     |
| Inotropic agents                                                                  | 11.8% (579)               | 16.5% (238)            | <0.001   |
| Systemic vasodilators                                                             | 9.4% (458)                | 12.7% (183)            | <0.001   |
| Hemodialysis                                                                      | 0.2% (12)                 | 0.2% (3)               | 0.80     |
| Cardiothoracic operation prior to catheterization during the same hospitalization | 4.1% (199)                | 8.7% (125)             | <0.001   |
| Outcomes % (n)                                                                    |                           |                        |          |
| Composite outcome within 1 day                                                    | 3.6% (174)                | 3.3% (48)              | 0.69     |
| Death within 1 day                                                                | 0.3% (13)                 | 0.3% (4)               | 0.94     |
| ECMO within 1 day                                                                 | 3.3% (162)                | 3.1% (44)              | 0.63     |
| Composite outcome on day of catheterization                                       | 0.9% (44)                 | 1.2% (17)              | 0.34     |
| Death on day of catheterization                                                   | 0.1% (6)                  | 0.2% (3)               | 0.45     |
| ECMO on day of catheterization                                                    | 0.8% (38)                 | 1.0% (14)              | 0.47     |

**Supplementary Table 2: Study population and outcome stratified by performance of trans-catheter intervention**

|                                              | Odds Ratio | 95% CI     | p      |
|----------------------------------------------|------------|------------|--------|
| Age                                          |            |            |        |
| <i>0 to 30 days with prematurity</i>         | 4.84       | 1.26-18.52 | 0.02   |
| <i>0-30 days without prematurity</i>         | 1.67       | 0.86-3.24  | 0.13   |
| <i>30 days to 1 year with prematurity</i>    | 1.01       | 0.45-2.23  | 0.99   |
| <i>30 days to 1 year without prematurity</i> | 1.62       | 1.14-2.30  | 0.006  |
| <i>1-8 years</i>                             | 1          | n/a        | n/a    |
| <i>8-18 years</i>                            | 0.46       | 0.27-0.76  | 0.003  |
| <i>&gt;18 years</i>                          | 0.50       | 0.18-1.42  | 0.19   |
| Race                                         |            |            |        |
| <i>White</i>                                 | 1          | n/a        | n/a    |
| <i>Black or African-American</i>             | 0.71       | 0.44-1.16  | 0.18   |
| <i>Asian</i>                                 | 0.72       | 0.31-1.70  | 0.46   |
| <i>Other</i>                                 | 0.87       | 0.57-1.33  | 0.52   |
| <i>Missing</i>                               | 1.67       | 0.97-2.85  | 0.06   |
| Payor                                        |            |            |        |
| <i>Private insurance</i>                     | 1          | n/a        | n/a    |
| <i>Public insurance</i>                      | 0.64       | 0.46-0.89  | 0.007  |
| <i>Other</i>                                 | 0.82       | 0.54-1.26  | 0.36   |
| Diagnosis                                    |            |            |        |
| <i>IPAH</i>                                  | 1          | n/a        | n/a    |
| <i>PAH with congenital heart disease</i>     | 1.31       | 0.82-2.12  | 0.26   |
| <i>PAH with cardiomyopathy</i>               | 1.59       | 0.78-3.26  | 0.20   |
| <i>PAH with orthotopic heart transplant</i>  | 2.78       | 1.34-5.73  | 0.006  |
| <i>PAH with chronic pulmonary embolism</i>   | 0.93       | 0.12-7.19  | 0.95   |
| Genetic syndrome                             | 0.94       | 0.65-1.35  | 0.74   |
| Non-cardiac structural anomaly               | 1.06       | 0.71-1.58  | 0.78   |
| Cardiac operation prior to catheterization   | 2.85       | 1.71-4.78  | <0.001 |
| Pre-procedural medical care                  |            |            |        |
| <i>Mechanical ventilation</i>                | 0.81       | 0.55-1.20  | 0.29   |
| <i>Hemodialysis</i>                          | 20.83      | 5.93-73.15 | <0.001 |
| <i>Inotropic agents</i>                      | 1.25       | 0.77-2.02  | 0.36   |
| <i>Systemic vasodilators</i>                 | 1.20       | 0.73-1.97  | 0.47   |
| <i>PDE-5 inhibitors</i>                      | 0.44       | 0.22-0.90  | 0.02   |
| <i>ETA antagonists</i>                       | 0.63       | 0.25-1.60  | 0.34   |
| <i>Calcium channel blockers</i>              | 0.47       | 0.20-1.08  | 0.08   |
| <i>*Prostacyclin analogues</i>               | *          | *          | *      |
| <i>*Inhaled nitric oxide</i>                 | *          | *          | *      |
| Intervention during procedure                | 0.69       | 0.49-0.99  | 0.04   |

**Supplementary Table 3: Multivariate model of risk factors for combined outcome with pulmonary vasodilators separated by class.**

Adjusted risk is 3.2% (95% CI: 1.9-5.4%)

Akaike Information Criteria: 1799

\* No odds ratios were calculated for these covariates because no events occurred in these groups.

|                                            |                                                     | Odds Ratio | 95% CI     | p      |
|--------------------------------------------|-----------------------------------------------------|------------|------------|--------|
| Diagnosis                                  | <i>IPAH</i>                                         | 1          | n/a        | n/a    |
|                                            | <i>PAH with congenital heart disease</i>            | 1.32       | 0.82-2.12  | 0.26   |
|                                            | <i>PAH with cardiomyopathy</i>                      | 1.53       | 0.74-3.12  | 0.25   |
|                                            | <i>PAH with orthotopic heart transplant</i>         | 2.62       | 1.28-5.36  | 0.008  |
|                                            | <i>PAH with chronic pulmonary embolism</i>          | 0.95       | 0.12-7.34  | 0.96   |
| Age                                        | <i>0 to 30 days with prematurity</i>                | 4.95       | 1.30-18.85 | 0.02   |
|                                            | <i>0-30 days without prematurity</i>                | 1.63       | 0.84-3.16  | 0.15   |
|                                            | <i>30 days to 1 year with prematurity</i>           | 0.99       | 0.45-2.20  | 0.99   |
|                                            | <i>30 days to 1 year without prematurity</i>        | 1.61       | 1.14-2.28  | 0.007  |
|                                            | <i>1-8 years</i>                                    | 1          | n/a        | n/a    |
|                                            | <i>8-18 years</i>                                   | 0.45       | 0.27-0.75  | 0.002  |
|                                            | <i>&gt;18 years</i>                                 | 0.49       | 0.17-1.38  | 0.18   |
| Race                                       | <i>White</i>                                        | 1          | n/a        | n/a    |
|                                            | <i>Black or African-American</i>                    | 0.71       | 0.44-1.17  | 0.19   |
|                                            | <i>Asian</i>                                        | 0.75       | 0.32-1.76  | 0.51   |
|                                            | <i>Other</i>                                        | 0.86       | 0.56-1.31  | 0.48   |
|                                            | <i>Missing</i>                                      | 1.62       | 0.95-2.79  | 0.08   |
| Payor                                      | <i>Private insurance</i>                            | 1          | n/a        | n/a    |
|                                            | <i>Public insurance</i>                             | 0.63       | 0.45-0.88  | 0.006  |
|                                            | <i>Other</i>                                        | 0.81       | 0.53-1.24  | 0.32   |
| Genetic syndrome                           |                                                     | 0.93       | 0.65-1.34  | 0.69   |
| Non-cardiac structural anomaly             |                                                     | 1.06       | 0.71-1.58  | 0.77   |
| Cardiac operation prior to catheterization |                                                     | 2.57       | 1.54-4.29  | <0.001 |
| Pre-procedural medical care                | <i>Mechanical ventilation</i>                       | 0.79       | 0.54-1.17  | 0.24   |
|                                            | <i>Hemodialysis</i>                                 | 19.30      | 5.47-68.15 | <0.001 |
|                                            | <i>Inotropic agents</i>                             | 1.06       | 0.65-1.71  | 0.82   |
|                                            | <i>Systemic vasodilators</i>                        | 1.85       | 1.18-2.91  | 0.007  |
|                                            | <i>Number of pulmonary hypertension medications</i> |            |            |        |
|                                            | <i>0</i>                                            | 1          | n/a        | n/a    |
|                                            | <i>1</i>                                            | 0.39       | 0.22-0.67  | 0.001  |
|                                            | <i>≥2</i>                                           | 0.35       | 0.10-1.15  | 0.08   |
| Intervention during procedure              |                                                     | 0.69       | 0.48-0.99  | 0.041  |

**Supplementary Table 4: Multivariate model of risk factors for combined outcome with pulmonary vasodilators counted as number of classes of medications**

(Adjusted risk is 3.2% (95% CI: 1.9%-5.4%))

Akaike information criteria: 1792

|                                            | Odds Ratio                                           | 95% CI | p           |        |
|--------------------------------------------|------------------------------------------------------|--------|-------------|--------|
| Age                                        |                                                      |        |             |        |
|                                            | <i>0 to 30 days with prematurity</i>                 | 5.36   | 1.12-25.66  | 0.04   |
|                                            | <i>0-30 days without prematurity</i>                 | 2.03   | 0.93-4.43   | 0.08   |
|                                            | <i>30 days to 1 year with prematurity</i>            | 0.93   | 0.32-2.73   | 0.90   |
|                                            | <i>30 days to 1 year without prematurity</i>         | 2.25   | 1.46-3.46   | <0.001 |
|                                            | <i>1-8 years</i>                                     | 1      | n/a         | n/a    |
|                                            | <i>8-18 years</i>                                    | 0.62   | 0.34-1.14   | 0.127  |
|                                            | <i>&gt;18 years</i>                                  | 0.78   | 0.26-2.34   | 0.66   |
| Race                                       |                                                      |        |             |        |
|                                            | <i>White</i>                                         | 1      | n/a         | n/a    |
|                                            | <i>Black or African-American</i>                     | 0.63   | 0.35-1.15   | 0.136  |
|                                            | <i>Asian</i>                                         | 0.76   | 0.27-2.13   | 0.61   |
|                                            | <i>Other</i>                                         | 0.96   | 0.59-1.56   | 0.87   |
|                                            | <i>Missing</i>                                       | 1.66   | 0.89-3.08   | 0.11   |
| Payor                                      |                                                      |        |             |        |
|                                            | <i>Private insurance</i>                             | 1      | n/a         | n/a    |
|                                            | <i>Public insurance</i>                              | 0.51   | 0.35-0.75   | <0.001 |
|                                            | <i>Other</i>                                         | 0.62   | 0.38-1.01   | 0.05   |
| Diagnosis                                  |                                                      |        |             |        |
|                                            | <i>IPAH</i>                                          | 1      | n/a         | n/a    |
|                                            | <i>APAH-CHD</i>                                      | 1.18   | 0.70-2.00   | 0.54   |
|                                            | <i>PAH with cardiomyopathy</i>                       | 1.18   | 0.52-2.66   | 0.69   |
|                                            | <i>PAH with orthotopic heart transplant</i>          | 1.41   | 0.44-4.54   | 0.57   |
|                                            | <i>Chronic thromboembolic pulmonary hypertension</i> | *      | *           | *      |
| Genetic syndrome                           |                                                      | 0.73   | 0.47-1.14   | 0.16   |
| Non-cardiac structural anomaly             |                                                      | 0.83   | 0.49-1.38   | 0.46   |
| Cardiac operation prior to catheterization |                                                      | 2.28   | 1.08-4.82   | 0.031  |
| Pre-procedural medical care                |                                                      |        |             |        |
|                                            | <i>Mechanical ventilation</i>                        | 0.80   | 0.51-1.28   | 0.36   |
|                                            | <i>Hemodialysis</i>                                  | 20.84  | 4.18-103.98 | <0.001 |
|                                            | <i>Inotropic agents</i>                              | 1.11   | 0.62-1.99   | 0.73   |
|                                            | <i>Systemic vasodilators</i>                         | 1.93   | 1.10-3.42   | 0.02   |
|                                            | <i>Pulmonary vasodilators</i>                        | 0.37   | 0.18-0.78   | 0.009  |
| Intervention during procedure              |                                                      | 0.59   | 0.37-0.94   | 0.03   |

**Supplementary Table 5: Multivariate model of risk factors for combined outcome restricted to first catheterization for each subject**

Adjusted risk of composite outcome is 4.0% (95% CI:2.3-7.1%).

Akaike information criteria: 1259

\* No odds ratio or confidence intervals are listed because no events occurred for subjects with chronic thromboembolic disease.

|                                            | Odds Ratio                                           | 95% CI | p          |        |
|--------------------------------------------|------------------------------------------------------|--------|------------|--------|
| Age                                        |                                                      |        |            |        |
|                                            | <i>0 to 30 days with prematurity</i>                 | 7.08   | 1.86-27.00 | 0.004  |
|                                            | <i>0-30 days without prematurity</i>                 | 1.95   | 0.87-4.38  | 0.11   |
|                                            | <i>30 days to 1 year with prematurity</i>            | 0.19   | 0.03-1.45  | 0.11   |
|                                            | <i>30 days to 1 year without prematurity</i>         | 0.98   | 0.58-1.66  | 0.95   |
|                                            | <i>1-8 years</i>                                     | 1      | n/a        | n/a    |
|                                            | <i>8-18 years</i>                                    | 0.47   | 0.26-0.88  | 0.02   |
|                                            | <i>&gt;18 years</i>                                  | 0.70   | 0.23-2.12  | 0.53   |
| Race                                       |                                                      |        |            |        |
|                                            | <i>White</i>                                         | 1      | n/a        | n/a    |
|                                            | <i>Black or African-American</i>                     | 0.92   | 0.51-1.66  | 0.78   |
|                                            | <i>Asian</i>                                         | 0.27   | 0.04-2.00  | 0.20   |
|                                            | <i>Other</i>                                         | 0.70   | 0.38-1.29  | 0.25   |
|                                            | <i>Missing</i>                                       | 1.39   | 0.64-3.03  | 0.41   |
| Payor                                      |                                                      |        |            |        |
|                                            | <i>Private insurance</i>                             | 1      | n/a        | n/a    |
|                                            | <i>Public insurance</i>                              | 0.64   | 0.40-1.02  | 0.06   |
|                                            | <i>Other</i>                                         | 0.86   | 0.50-1.46  | 0.57   |
| Diagnosis                                  |                                                      |        |            |        |
|                                            | <i>IPAH</i>                                          | 1      | n/a        | n/a    |
|                                            | <i>APAH-CHD</i>                                      | 0.59   | 0.33-1.02  | 0.06   |
|                                            | <i>PAH with cardiomyopathy</i>                       | 1.56   | 0.74-3.31  | 0.24   |
|                                            | <i>PAH with orthotopic heart transplant</i>          | 2.43   | 1.12-5.29  | 0.03   |
|                                            | <i>Chronic thromboembolic pulmonary hypertension</i> | *      | *          | *      |
| Genetic syndrome                           |                                                      | 0.77   | 0.44-1.38  | 0.39   |
| Non-cardiac structural anomaly             |                                                      | 1.09   | 0.61-1.95  | 0.76   |
| Cardiac operation prior to catheterization |                                                      | 1.43   | 0.69-2.97  | 0.333  |
| Pre-procedural medical care                |                                                      |        |            |        |
|                                            | <i>Mechanical ventilation</i>                        | 1.67   | 1.01-2.76  | 0.05   |
|                                            | <i>Hemodialysis</i>                                  | 13.67  | 3.75-49.75 | <0.001 |
|                                            | <i>Inotropic agents</i>                              | 1.81   | 1.00-3.30  | 0.05   |
|                                            | <i>Systemic vasodilators</i>                         | 1.58   | 0.87-2.88  | 0.14   |
|                                            | <i>Pulmonary vasodilators</i>                        | 0.51   | 0.27-0.95  | 0.03   |
| Intervention during procedure              |                                                      | 0.96   | 0.58-1.58  | 0.88   |

**Supplementary Table 6: Multivariate model of risk factors for combined outcome excluding subjects with cardiac operation within 1 day of catheterization**

Adjusted risk: 2.6% (95% CI: 1.5-4.7%)

Akaike information criteria: 1009

\* No odds ratio or confidence intervals are listed because no events occurred for subjects with chronic thromboembolic disease

| Center catheterization volume (by quintile) | Observed risk of death or ECMO within 1 day of procedure | <i>p</i> | Adjusted risk of death or ECMO within 1 day of procedure |
|---------------------------------------------|----------------------------------------------------------|----------|----------------------------------------------------------|
| 1                                           | 6.2% (35/562)                                            | <0.0001  | 6.2% (3.3-11.4%)                                         |
| 2                                           | 5.5% (40/688)                                            |          | 5.8% (3.3-10.5%)                                         |
| 3                                           | 3.5% (35/962)                                            |          | 3.7% (2.1-6.6%)                                          |
| 4                                           | 3.3% (48/1,410)                                          |          | 3.3% (1.8-5.8%)                                          |
| 5                                           | 2.5% (64/2,530)                                          |          | 2.7% (1.6-4.7%)                                          |

**Supplementary Table 7: Observed risk and adjusted risk for composite outcomes stratified by center catheterization lab volume**

|                                             |                                                      | Odds Ratio | 95% CI     | p      |
|---------------------------------------------|------------------------------------------------------|------------|------------|--------|
| Center catheterization volume (by quintile) |                                                      |            |            |        |
|                                             | 1                                                    | 1.67       | 1.00-2.77  | 0.04   |
|                                             | 2                                                    | 1.56       | 0.98-2.59  | 0.06   |
|                                             | 3                                                    | 1          | n/a        | n/a    |
|                                             | 4                                                    | 0.88       | 0.55-1.41  | 0.59   |
|                                             | 5                                                    | 0.75       | 0.49-1.16  | 0.20   |
| Age                                         |                                                      |            |            |        |
|                                             | <i>0 to 30 days with prematurity</i>                 | 5.06       | 1.37-18.7  | 0.02   |
|                                             | <i>0-30 days without prematurity</i>                 | 1.52       | 0.78-2.93  | 0.22   |
|                                             | <i>30 days to 1 year with prematurity</i>            | 0.98       | 0.45-2.14  | 0.96   |
|                                             | <i>30 days to 1 year without prematurity</i>         | 1.54       | 1.09-2.18  | 0.02   |
|                                             | <i>1-8 years</i>                                     | 1          | n/a        | n/a    |
|                                             | <i>8-18 years</i>                                    | 0.44       | 0.27-0.74  | 0.002  |
|                                             | <i>&gt;18 years</i>                                  | 0.47       | 0.17-1.35  | 0.16   |
| Race                                        |                                                      |            |            |        |
|                                             | <i>White</i>                                         | 1          | n/a        | n/a    |
|                                             | <i>Black or African-American</i>                     | 0.69       | 0.43-1.11  | 0.13   |
|                                             | <i>Asian</i>                                         | 0.79       | 0.34-1.83  | 0.58   |
|                                             | <i>Other</i>                                         | 0.87       | 0.57-1.31  | 0.50   |
|                                             | <i>Missing</i>                                       | 1.67       | 0.99-2.81  | 0.06   |
| Payor                                       |                                                      |            |            |        |
|                                             | <i>Private insurance</i>                             | 1          | n/a        | n/a    |
|                                             | <i>Public insurance</i>                              | 0.56       | 0.41-0.78  | <0.001 |
|                                             | <i>Other</i>                                         | 0.70       | 0.47-1.05  | 0.08   |
| Diagnosis                                   |                                                      |            |            |        |
|                                             | <i>IPAH</i>                                          | 1          | n/a        | n/a    |
|                                             | <i>APAH-CHD</i>                                      | 1.32       | 0.82-2.12  | 0.25   |
|                                             | <i>PAH with cardiomyopathy</i>                       | 1.48       | 0.72-3.02  | 0.28   |
|                                             | <i>PAH with orthotopic heart transplant</i>          | 2.77       | 1.36-5.62  | 0.005  |
|                                             | <i>Chronic thromboembolic pulmonary hypertension</i> | 0.96       | 0.13-7.41  | 0.97   |
|                                             | <i>Genetic syndrome</i>                              | 0.92       | 0.64-1.32  | 0.66   |
|                                             | <i>Non-cardiac structural anomaly</i>                | 1.12       | 0.76-1.67  | 0.55   |
|                                             | <i>Cardiac operation prior to catheterization</i>    | 2.52       | 1.52-4.19  | <0.001 |
| Pre-procedural medical care                 |                                                      |            |            |        |
|                                             | <i>Mechanical ventilation</i>                        | 0.78       | 0.54-1.15  | 0.21   |
|                                             | <i>Hemodialysis</i>                                  | 15.97      | 4.65-54.79 | <0.001 |
|                                             | <i>Inotropic agents</i>                              | 1.06       | 0.66-1.72  | 0.35   |
|                                             | <i>Systemic vasodilators</i>                         | 2.11       | 1.36-3.27  | 0.001  |
|                                             | <i>Pulmonary vasodilators</i>                        | 0.39       | 0.23-0.66  | 0.001  |
| Intervention during procedure               |                                                      |            |            |        |
|                                             |                                                      | 0.73       | 0.51-1.03  | 0.07   |

**Supplementary Table 8: Multivariate model of risk factors for combined outcome including center catheterization volume**

Adjusted risk: 3.7% (95% CI: 2.1-6.6%)

Akaike Information Criteria: 1791
